# Supplementary material
Source: PubMed Central journal article supplement (PMC8524358)
Supplement: NIHMS1732480-supplement-Supporting_Information.pdf [file NIHMS1732480-supplement-Supporting_Information.pdf]

## SUPPLEMENTAL INFORMATION

### Methods S1. Chemical syntheses and characterization. Related to Figure 3.

SJF-7432 = HP13

SJF-7434 = HP14

SJF-4625 = HP15

SJF-4627 = HP16

JH-6073 = HP17

**General comments.** Unless otherwise indicated, common reagents or materials were obtained from commercial source and used without further purification. Tetrahydrofuran (THF), dimethylformamide (DMF), and Dichloromethane ( $\text{CH}_2\text{Cl}_2$ ) were dried by a PureSolv<sup>TM</sup> solvent drying system. Flash column chromatography was performed using silica gel 60 (230-400 mesh). Analytical (TLC) and preparative (PTLC) thin layer chromatography was carried out on Merck silica gel plates with QF-254 indicator and visualized by UV or iodine.  $^1\text{H}$  and  $^{13}\text{C}$  NMR spectra were recorded on an Agilent DD<sub>2</sub> 500 (500 MHz  $^1\text{H}$ ; 125 MHz  $^{13}\text{C}$ ) or Agilent DD<sub>2</sub> 600 (600 MHz  $^1\text{H}$ ; 150 MHz  $^{13}\text{C}$ ) or Agilent DD<sub>2</sub> 400 (400 MHz  $^1\text{H}$ ; 100 MHz  $^{13}\text{C}$ ) spectrometer at room temperature. Chemical shifts were reported in ppm relative to the residual  $\text{CDCl}_3$  ( $\delta$  7.26 ppm  $^1\text{H}$ ;  $\delta$  77.00 ppm  $^{13}\text{C}$ ),  $\text{CD}_3\text{OD}$  ( $\delta$  3.31 ppm  $^1\text{H}$ ;  $\delta$  49.00 ppm  $^{13}\text{C}$ ), or  $d^6$ -DMSO ( $\delta$  2.50 ppm  $^1\text{H}$ ;  $\delta$  39.52 ppm  $^{13}\text{C}$ ). NMR chemical shifts were expressed in ppm relative to internal solvent peaks, and coupling constants were measured in Hz. (bs = broad signal). Mass spectra were obtained using electrospray ionization (ESI) on a time of flight (TOF) mass spectrometer. **VHL** ligands **7** and **10** were prepared according with the literature or acquired commercially.

# Scheme 1.- Synthetic Approach for SJF-7432, SJF-7434, SJF-4625 and JH-6073

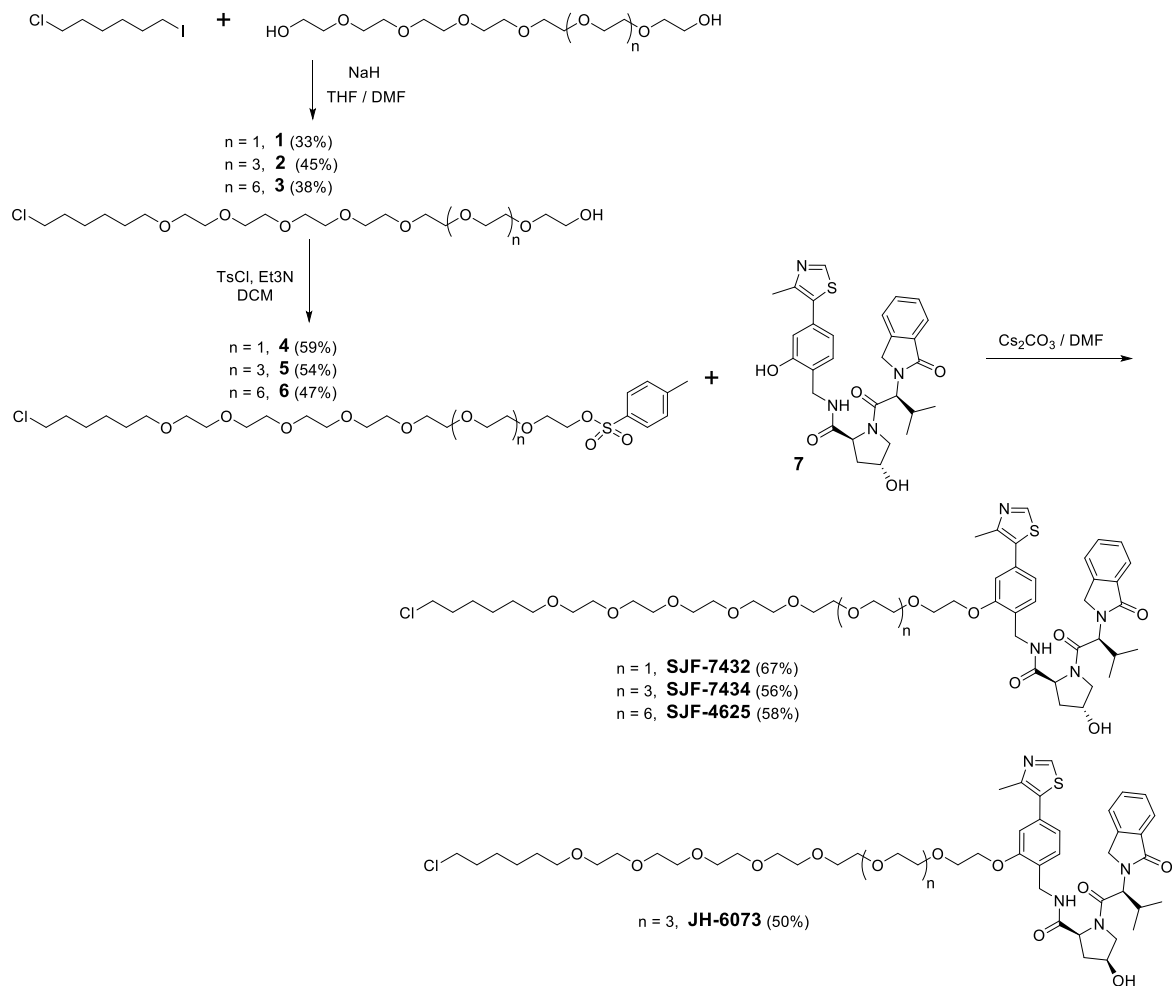



1.50 – 1.30 (m, 4H).  $^{13}\text{C}$  NMR (151 MHz, Chloroform-d)  $\delta$  72.59, 71.35, 70.71, 70.71, 70.70, 70.69, 70.68, 70.67, 70.67, 70.66, 70.64, 70.44, 70.43, 70.21, 61.83, 45.18, 32.67, 29.58, 26.83, 25.55. LC-MS (ESI);  $m/z$   $[\text{M}+\text{H}]^+$ ; Calcd.  $\text{C}_{20}\text{H}_{42}\text{ClO}_8$ , 445.2568. Found 445.38.

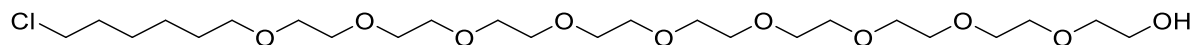

**33-chloro-3,6,9,12,15,18,21,24,27-nonaoxatritriacontan-1-ol (2).** To a solution of 3,6,9,12,15,18,21,24-octaoxahexacosane-1,26-diol (1.68 mL, 4.56 mmol) in a mixture of DMF (5 mL) and THF (5 mL) was added NaH (60.0 %, 150 mg, 3.75 mmol) at room temperature under argon. After 40 minutes, 1-chloro-6-iodo-hexane (0.154 mL, 1.01 mmol) was added, and the mixture was stirred at room temperature for 16 h (overnight). The mixture was then quenched with a mixture of diluted 1 M HCl (5 mL) and brine (15 mL), and then the reaction mixture was extracted with Ethyl acetate (50 mL). The organic layer was dried over  $\text{Na}_2\text{SO}_4$  and the solvent removed under reduced pressure. The crude product was purified by column chromatography (Gradient, DCM 100% to DCM:MeOH, 9:1) to give 242 mg of pure product (45% yield)..  $^1\text{H}$  NMR (500 MHz, Chloroform-d)  $\delta$  3.84 – 3.54 (m, 36H), 3.51 (t,  $J$  = 7.1 Hz, 2H), 3.44 (t,  $J$  = 6.6 Hz, 2H), 2.76 (bs, 1H), 1.76 (p,  $J$  = 7.0 Hz, 2H), 1.58 (p,  $J$  = 6.8 Hz, 2H), 1.48 – 1.30 (m, 4H).  $^{13}\text{C}$  NMR (151 MHz, Chloroform-d)  $\delta$  72.66, 71.34, 70.72, 70.70, 70.66 (9C), 70.64, 70.62, 70.62, 70.40, 70.21, 61.81, 45.17, 32.66, 29.57, 26.82, 25.54. LC-MS (ESI);  $m/z$   $[\text{M}+\text{H}]^+$ ; Calcd.  $\text{C}_{24}\text{H}_{50}\text{ClO}_{10}$ , 533.3092. Found 533.45.

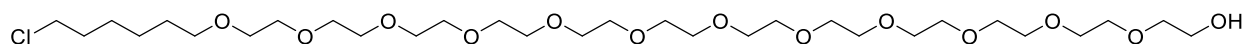

**42-chloro-3,6,9,12,15,18,21,24,27,30,33,36-dodecaoxadotetracontan-1-ol (3).** To a solution of 3,6,9,12,15,18,21,24,27,30,33-undecaoxapentatriacontane-1,35-diol (998 mg, 1.83 mmol) in a mixture of DMF (3 mL) and THF (3 mL) was added NaH (60.0 %, 48.7 mg, 1.22 mmol) at room temperature under argon. After 40 minutes, 1-chloro-6-iodo-hexane (0.0616 mL, 0.406 mmol) was added, and the mixture was stirred at room temperature for 16 h (overnight). The mixture was then quenched with a mixture of diluted 1 M HCl (5 mL) and brine (20 mL), and then the reaction mixture was extracted with Ethyl acetate (50 mL). The organic layer was dried over  $\text{Na}_2\text{SO}_4$  and the solvent removed under reduced pressure. The crude product was purified by column chromatography (Gradient, DCM 100% to DCM:MeOH, 7:3) to give 104 mg of pure product as an oil (38% yield)  $^1\text{H}$  (400 MHz, Chloroform-d)  $\delta$  3.93 – 3.55 (m, 48H), 3.51 (t,  $J$  = 6.7 Hz, 2H), 3.44 (t,  $J$  = 6.6 Hz, 2H), 2.56 (bs, 1H), 1.76 (pd,  $J$  = 6.7, 2.1 Hz, 2H), 1.64 – 1.50 (m, 2H), 1.50 – 1.27 (m, 4H).  $^{13}\text{C}$  NMR (151 MHz,  $\text{CDCl}_3$ )  $\delta$  72.63, 71.34, 70.72, 70.70, 70.68, 70.66 (15C), 70.63, 70.42, 70.42, 70.21, 61.82, 45.17, 32.65, 29.56, 26.81, 25.53. LC-MS (ESI);  $m/z$   $[\text{M}+\text{H}]^+$ ; Calcd.  $\text{C}_{30}\text{H}_{62}\text{ClO}_{13}$ , 665.3878. Found 665.54.



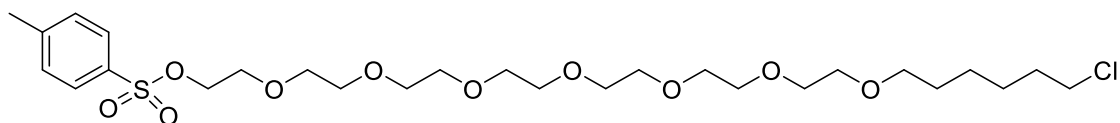

**27-chloro-3,6,9,12,15,18,21-heptaoxaheptacosyl 4-methylbenzenesulfonate (4).** To a solution of 27-chloro-3,6,9,12,15,18,21-heptaoxaheptacosan-1-ol (114 mg, 0.256 mmol) and TEA (0.214 mL, 1.54 mmol) in DCM (5 ml) was added toluene-4-sulfonyl chloride (63.5 mg, 0.333 mmol) at room temperature. The reaction mixture was stirred for 5 at the same temperature. Then the reaction mixture was poured into aqueous NaHCO<sub>3</sub> (sat. solution, 10 mL) and product was extracted with DCM (2x20 mL). Organic extracts were combined, dried (Na<sub>2</sub>SO<sub>4</sub>) and evaporated under vacuum. Crude product was purified by column chromatography (DCM 100% to DCM:MeOH, 95:5), to give 90 mg (58% yield) of product as an oil. <sup>1</sup>H NMR (500 MHz, Chloroform-d) δ 7.79 (d, J = 10.1 Hz, 2H), 7.34 (d, J = 6.6 Hz, 2H), 4.15 (t, J = 6.1 Hz, 2H), 3.81 – 3.55 (m, 24H), 3.53 (t, J = 6.7 Hz, 2H), 3.45 (t, J = 7.9 Hz, 2H), 2.44 (s, 3H), 1.77 (p, J = 9.2 Hz, 2H), 1.59 (p, J = 7.8, 6.3 Hz, 2H), 1.52 – 1.22 (m, 4H). <sup>13</sup>C NMR (151 MHz, Chloroform-d) δ 144.89, 133.13, 129.93, 128.10, 71.35, 70.87, 70.73, 70.71, 70.69 (6C), 70.68, 70.64, 70.22, 69.36, 68.80, 45.18, 32.67, 29.58, 26.82, 25.55, 21.77. LC-MS (ESI); m/z [M+H]<sup>+</sup>; calcd. C<sub>27</sub>H<sub>48</sub>ClO<sub>10</sub>S, 599.2656. Found 599.37.

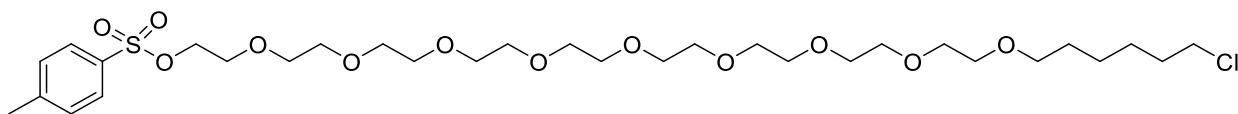

**33-chloro-3,6,9,12,15,18,21,24,27-nonaoxatritriacontyl 4-methylbenzenesulfonate (5).** To a solution of 33-chloro-3,6,9,12,15,18,21,24,27-nonaoxatritriacontan-1-ol (230 mg, 0.431 mmol) and TEA (0.361 mL, 2.59 mmol) in DCM (5 ml) was added Toluene-4-sulfonyl chloride (107 mg, 0.561 mmol) at room temperature. The reaction mixture was stirred for 5 at the same temperature. Then the reaction mixture was poured into aqueous NaHCO<sub>3</sub> (sat. solution, 10 mL) and product was extracted with DCM (2x20 mL). Organic extracts were combined, dried (Na<sub>2</sub>SO<sub>4</sub>) and evaporated under vacuum. Crude product was purified by column chromatography (DCM 100% to DCM:MeOH, 95:5), to give 161 mg (54% yield) of product. <sup>1</sup>H NMR (600 MHz, DMSO-d<sub>6</sub>) δ 7.78 (d, J = 7.6 Hz, 2H), 7.48 (d, J = 7.7 Hz, 2H), 4.11 (t, J = 5.2 Hz, 2H), 3.61 (t, J = 6.3 Hz, 2H), 3.57 (t, J = 4.3 Hz, 2H), 3.47 (d, J = 32.9 Hz, 32H), 3.36 (t, J = 6.1 Hz, 2H), 2.42 (s, 3H), 1.70 (p, J = 6.7 Hz, 2H), 1.48 (p, J = 6.6 Hz, 2H), 1.38 (p, J = 7.1 Hz, 2H), 1.30 (p, J = 7.5 Hz, 2H). <sup>13</sup>C NMR (151 MHz, DMSO-d<sub>6</sub>) δ 144.86, 132.41, 130.11, 127.61, 70.16, 69.97, 69.81, 69.78 (6C), 69.75, 69.70, 69.65, 69.48, 67.88, 45.35, 32.02, 29.05, 26.11, 24.93, 21.08. LC-MS (ESI); m/z [M+H]<sup>+</sup>; Calcd. C<sub>31</sub>H<sub>56</sub>ClO<sub>12</sub>S, 687.3181. Found 687.44.

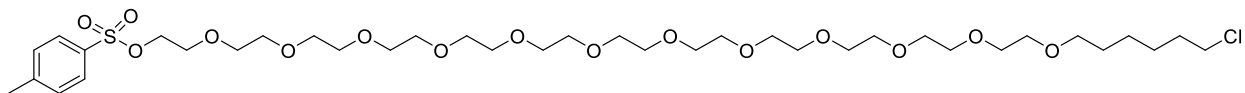

**42-chloro-3,6,9,12,15,18,21,24,27,30,33,36-dodecaoxadotetracontyl 4-methylbenzenesulfonate (6).** To a solution of 42-chloro-3,6,9,12,15,18,21,24,27,30,33,36-dodecaoxadotetracontan-1-ol (48.0 mg, 0.0722 mmol) and TEA (0.0603 mL, 0.433 mmol) in DCM (2 ml) was added Toluene-4-sulfonyl chloride (17.9 mg, 0.0938 mmol) at room temperature. The reaction mixture was stirred for 5h at the same temperature. Then the reaction mixture was poured into aqueous NaHCO<sub>3</sub> (sat. solution, 10 mL) and product was extracted with DCM (2x20 mL). Organic extracts were combined, dried (Na<sub>2</sub>SO<sub>4</sub>) and evaporated under vacuum. Crude product was purified by PTLC (DCM:MeOH:NH<sub>4</sub>OH, 90:9:1), to give 28mg (47% yield) of pure product. <sup>1</sup>H NMR (400 MHz, DMSO-d<sub>6</sub>) δ 7.78 (d, J = 8.3 Hz, 1H), 7.48 (d, J = 8.0 Hz, 2H), 4.23 – 3.99 (m, 2H), 3.61 (t, J = 6.6 Hz, 2H), 3.59 – 3.40 (m, 46H), 3.36 (t, J = 6.5 Hz, 2H), 2.42 (s, 3H), 1.77 – 1.62 (m, 2H), 1.48 (p, J = 6.8 Hz, 2H), 1.43 – 1.17 (m, 4H). <sup>13</sup>C NMR (151 MHz, DMSO-d<sub>6</sub>) δ 144.90, 132.42, 130.14, 127.64, 70.18, 69.99, 69.83, 69.79 (C18), 69.71, 69.67, 69.51, 67.89, 45.37, 32.04, 29.07, 26.13, 24.95, 21.10. LC-MS (ESI); m/z [M+Na]<sup>+</sup>; Calcd. C<sub>37</sub>H<sub>67</sub>ClO<sub>15</sub>SNa, 841.3787.

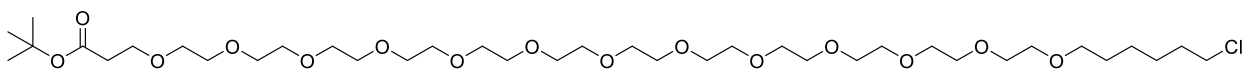

**tert-butyl 46-chloro-4,7,10,13,16,19,22,25,28,31,34,37,40-tridecaoxahexatetracontanoate (8).** To a solution of 42-chloro-3,6,9,12,15,18,21,24,27,30,33,36-dodecaoxadotetracontan-1-ol (**3**) (50.0 mg, 0.0752 mmol) in acetonitrile (2 mL) was added tert-butyl prop-2-enoate (0.218 mL, 1.50 mmol) followed by Triton B (40.0 %, 0.158 mL, 0.400 mmol, in 40% by weight in water). The mixture was stirred at room temperature for 48 hours. The mixture was concentrated under vacuum and crude product was purified by PTLC (DCM:MeOH:NH<sub>4</sub>OH, 90:9:1) to give 42 mg of product as an oil (70% yield). <sup>1</sup>H NMR (400 MHz, Chloroform-d) δ 3.68 (t, J = 6.6 Hz, 2H), 3.65 – 3.54 (m, 48H), 3.51 (t, J = 6.7 Hz, 2H), 3.43 (t, J = 6.6 Hz, 2H), 2.48 (t, J = 6.6 Hz, 2H), 1.75 (p, J = 13.5, 6.2 Hz, 2H), 1.64 – 1.50 (m, 2H), 1.42 (s, 9H), 1.50 – 1.26 (m, 4H). <sup>13</sup>C NMR (151 MHz, DMSO-d<sub>6</sub>) δ 170.42, 79.71, 70.19, 69.84, 69.81(20C), 69.72, 69.69, 69.52, 66.24, 45.38, 35.85, 32.04, 29.08, 27.75, 26.13, 24.95. LC-MS (ESI); m/z [M+Na]<sup>+</sup>; Calcd. for C<sub>37</sub>H<sub>73</sub>ClO<sub>15</sub>Na, 815.4535. Found 815.4527.

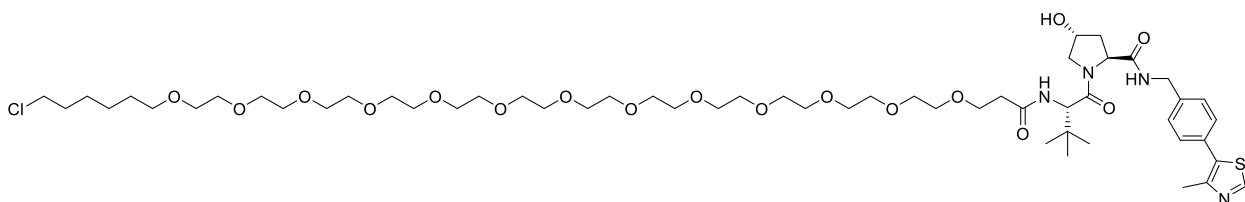

**(2S,4R)-1-((S)-2-(tert-butyl)-49-chloro-4-oxo-7,10,13,16,19,22,25,28,31,34,37,40,43-tridecaoxa-3-azanotetracontanoyl)-4-hydroxy-N-(4-(4-methylthiazol-5-yl)benzyl)pyrrolidine-2-carboxamide (SJF-4627).** A solution of tert-butyl 46-chloro-4,7,10,13,16,19,22,25,28,31,34,37,40-tridecaoxahexatetracontanoate (**8**) (18.0 mg, 0.0227 mmol) in a mixture of TFA (1 ml, 13.46 mmol) and Dichloromethane (2 ml) was stirred for 2 h. Then the solvent was removed under vacuum and crude product was dried under high vacuum for 2 h. Crude product (**9**) was used in the next step without any further purification (16.7 mg, quantitative yield). HRMS (ESI); m/z: [M+H]<sup>+</sup> Calcd. for C<sub>33</sub>H<sub>66</sub>ClO<sub>15</sub>, 737.4090. Found 737.4090.

To a solution of 46-chloro-4,7,10,13,16,19,22,25,28,31,34,37,40-tridecaoxahexatetracontanoic acid (16.7 mg, 0.0226 mmol) and (2S,4R)-1-[(2S)-2-amino-3,3-dimethyl-butanoyl]-4-hydroxy-N-[[4-(4-methylthiazol-5-yl)phenyl]methyl]pyrrolidine-2-carboxamide;hydrochloride (12.7 mg, 0.0272 mmol) in DMF (2 ml) was added N,N-Diisopropylethylamine (0.298 mL, 1.71 mmol) and O-(7-Azabenzotriazol-1-yl)-N,N,N',N'-tetramethyluronium hexafluorophosphate (12.9 mg, 0.0340 mmol) at room temperature. The reaction mixture was stirred for 12 h (overnight) at the same temperature. TLC (DCM:MeOH:NH<sub>4</sub>OH, 1:1) shows no starting materials. Reaction mixture was diluted with EtOAc (10 mL), washed with water (4x10 mL), dried (Na<sub>2</sub>SO<sub>4</sub>) and evaporated under vacuum. Crude product was purified by PTLC (DCM:MeOH:NH<sub>4</sub>OH, 90:9:1), to 23 mg of product (88 % yield). <sup>1</sup>H NMR (500 MHz, DMSO-d<sub>6</sub>) δ 8.98 (s, 1H), 8.56 (t, J = 5.9 Hz, 1H), 7.91 (d, J = 9.3 Hz, 1H), 7.42 (d, J = 8.2 Hz, 2H), 7.38 (d, J = 8.2 Hz, 2H), 5.12 (d, J = 3.4 Hz, 1H), 4.55 (d, J = 9.4 Hz, 1H), 4.46 – 4.39 (m, 2H), 4.37 – 4.32 (m, 1H), 4.22 (dd, J = 15.8, 5.2 Hz, 1H), 4.00 – 3.42 (m, 54H), 3.37 (t, J = 6.5 Hz, 2H), 2.58 – 2.51 (m, 1H), 2.44 (s, 3H), 2.39 – 2.32 (m, 1H), 2.07 – 2.00 (m, 1H), 1.95 – 1.87 (m, 1H), 1.70 (dt, J = 14.3, 6.7 Hz, 2H), 1.48 (p, J = 13.8, 6.7 Hz, 2H), 1.42 – 1.25 (m, 4H), 0.94 (s, 9H). <sup>13</sup>C NMR (151 MHz, DMSO-d<sub>6</sub>) δ 171.96, 169.96, 169.54, 151.48, 147.73, 139.53, 131.18, 129.65, 128.65, 127.44, 70.19, 69.84, 69.80, 69.73, 69.52, 69.50, 68.89 (20C), 66.97, 58.73, 56.40, 56.31, 45.39, 41.66, 37.96, 35.67, 35.39, 32.04, 29.08, 26.34, 26.13, 24.95, 15.96. HRMS (ESI); m/z [M+H]<sup>+</sup>: Calcd. for C<sub>55</sub>H<sub>94</sub>ClN<sub>4</sub>O<sub>17</sub>S, 1149.6023. Found 1149.6023.

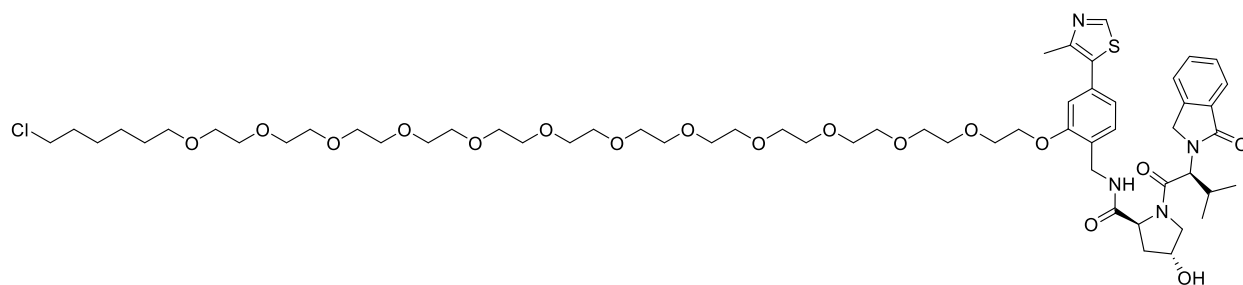

**(2S,4R)-N-(2-((42-chloro-3,6,9,12,15,18,21,24,27,30,33,36-dodecaoxadotetracontyl)oxy)-4-(4-methylthiazol-5-yl)benzyl)-4-hydroxy-1-((S)-3-methyl-2-(1-oxoisindolin-2-yl)butanoyl)pyrrolidine-2-carboxamide (SJF-4625).** To a mixture of (2S,4R)-4-hydroxy-N-[[2-hydroxy-4-(4-methylthiazol-5-yl)phenyl]methyl]-1-[(2S)-3-methyl-2-(1-oxoisindolin-2-yl)butanoyl]pyrrolidine-2-carboxamide (22.0 mg, 0.0402 mmol) and 27-chloro-3,6,9,12,15,18,21-heptaosaheptacosyl 4-methylbenzenesulfonate (**6**) (23.0 mg, 0.0335 mmol) in DMF (1 mL) was added

Cs<sub>2</sub>CO<sub>3</sub> (21.8 mg, 0.0669 mmol). After stirring at room temperature for 12 hrs (overnight), the reaction mixture was diluted with EtOAc (10 mL) and washed with water (5x10 mL), organic phase was dried (Na<sub>2</sub>SO<sub>4</sub>, and evaporated under vacuum. Crude product was purified by PTLC (DCM:MeOH:NH<sub>4</sub>OH, 90:9:1) to give 21 mg of product (58% yield). <sup>1</sup>H NMR (400 MHz, DMSO-d<sub>6</sub>) δ 8.99 (s, 1H), 8.38 (t, 1H), 7.71 (d, J = 7.5 Hz, 1H), 7.68 – 7.55 (m, 2H), 7.55 – 7.43 (m, 1H), 7.34 (d, J = 7.8 Hz, 1H), 7.05 (s, 1H), 7.01 (d, J = 7.8 Hz, 1H), 5.11 (d, J = 3.9 Hz, 1H), 4.71 (d, J = 10.8 Hz, 1H), 4.51 (dd, 2H), 4.42 – 4.13 (m, 5H), 4.10 – 3.25 (m, 50H), 2.47 (s, 3H), 2.39 – 2.26 (m, 1H), 2.11 – 1.99 (m, 1H), 1.97 – 1.86 (m, 1H), 1.69 (p, J = 14.4, 6.9 Hz, 2H), 1.48 (p, J = 6.8 Hz, 2H), 1.43 – 1.22 (m, 4H), 0.97 (d, J = 6.4 Hz, 3H), 0.74 (d, J = 6.4 Hz, 3H). <sup>13</sup>C NMR (151 MHz, DMSO-d<sub>6</sub>) δ 172.00, 168.53, 167.93, 156.30, 151.90, 148.35, 142.62, 132.02, 131.79, 131.69, 131.40, 128.34, 128.11, 127.60, 124.04, 123.45, 121.49, 112.55, 70.60, 70.51, 70.27, 70.24 (18C), 70.21, 69.92, 69.43, 69.05, 68.34, 59.14, 58.21, 55.84, 47.24, 45.80, 38.51, 37.50, 32.45, 29.48, 28.82, 26.54, 25.36, 19.30, 19.04, 16.44. HRMS (ESI); m/z: [M+H]<sup>+</sup> Calcd. for C<sub>59</sub>H<sub>92</sub>ClN<sub>4</sub>O<sub>17</sub>S, 1195.5866. Found 1195.5869.

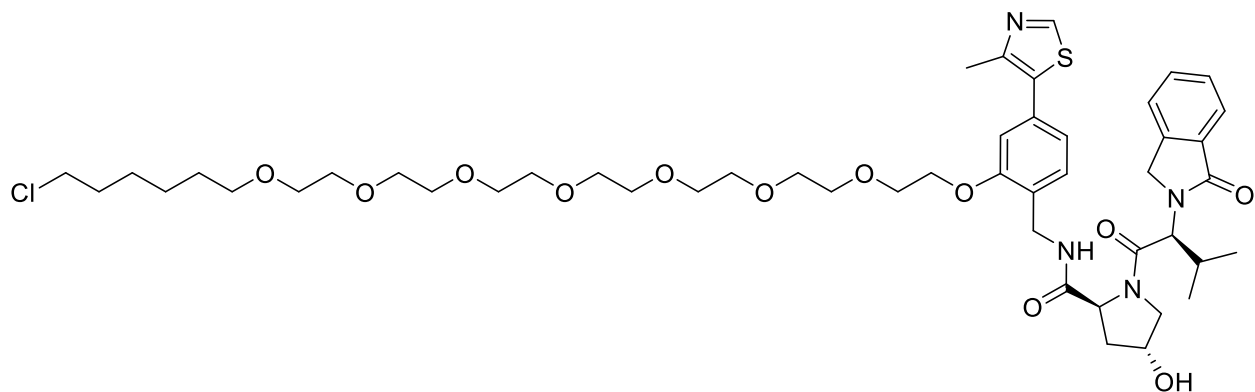

**(2S,4R)-N-(2-((27-chloro-3,6,9,12,15,18,21-heptaooxaheptacosyl)oxy)-4-(4-methylthiazol-5-yl)benzyl)-4-hydroxy-1-((S)-3-methyl-2-(1-oxoisindolin-2-yl)butanoyl)pyrrolidine-2-carboxamide (SJF-7432).** To a mixture of (2S,4R)-4-hydroxy-N-[[2-hydroxy-4-(4-methylthiazol-5-yl)phenyl]methyl]-1-[(2S)-3-methyl-2-(1-oxoisindolin-2-yl)butanoyl]pyrrolidine-2-carboxamide (25.3 mg, 0.0461 mmol) and 27-chloro-3,6,9,12,15,18,21-heptaooxaheptacosyl 4-methylbenzenesulfonate (**4**) (23.0 mg, 0.0384 mmol) in DMF (1 mL) was added Cs<sub>2</sub>CO<sub>3</sub> (25.0 mg, 0.0768 mmol). After stirring at room temperature for 12 hrs (overnight), the reaction mixture was diluted with EtOAc (10 mL) and washed with water (5x10 mL), organic phase was dried (Na<sub>2</sub>SO<sub>4</sub>, and evaporated under vacuum. Crude product was purified by PTLC (DCM:MeOH:NH<sub>4</sub>OH, 90:9:1) to give 25 mg of product (67% yield). <sup>1</sup>H NMR (500 MHz, DMSO-d<sub>6</sub>) δ 8.99 (s, 1H), 8.36 (t, J = 5.2 Hz, 1H), 7.71 (d, J = 7.4 Hz, 1H), 7.67 – 7.55 (m, 2H), 7.50 (t, 1H), 7.34 (d, J = 7.7 Hz, 1H), 7.05 (s, 1H), 7.01 (d, J = 7.8 Hz, 1H), 5.09 (d, J = 3.5 Hz, 1H), 4.72 (d, J = 10.7 Hz, 1H), 4.60 – 4.42 (m, 2H), 4.45 – 4.12 (m, 5H), 4.04 – 3.41 (m, 31H), 3.35 (t, J = 6.5 Hz, 2H), 2.47 (s, 3H), 2.34 (dq, J = 12.2, 6.6 Hz, 1H), 2.04 (dd, J = 12.7, 8.1 Hz, 1H), 1.92 (ddd, J = 12.9, 7.9, 4.7 Hz, 1H), 1.69 (dt, J = 13.1, 6.5 Hz, 2H), 1.47 (dt, J = 12.7, 6.4 Hz, 2H), 1.37 (dt, J = 14.2, 7.2 Hz, 2H), 1.34 – 1.22 (m, 2H), 0.97 (d, J = 6.1

Hz, 3H), 0.74 (d, J = 6.1 Hz, 3H). <sup>13</sup>C NMR (151 MHz, DMSO-d<sub>6</sub>) δ 171.53, 168.07, 167.45, 155.85, 151.45, 147.91, 142.19, 131.56, 131.37, 131.25, 130.96, 127.89, 127.67, 127.18, 123.61, 123.00, 121.05, 112.13, 70.16, 70.08, 69.84, 69.82, 69.80, 69.78 (6C), 69.48, 69.00, 68.61, 67.90, 58.70, 57.77, 55.41, 46.81, 45.36, 38.10, 37.06, 32.02, 29.05, 28.39, 26.11, 24.93, 18.88, 18.63, 16.03. HRMS (ESI); m/z: [M+H]<sup>+</sup> Calcd. for C<sub>49</sub>H<sub>72</sub>ClN<sub>4</sub>O<sub>12</sub>S, 975.4555. Found 975.4532.

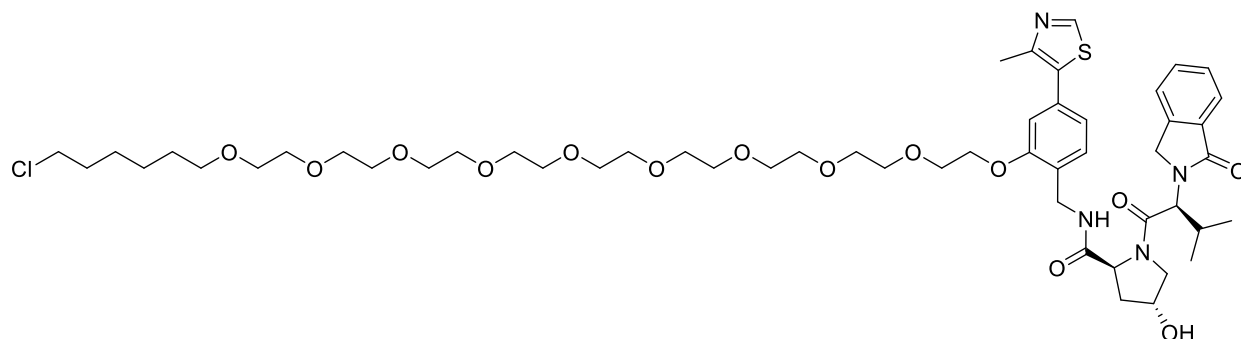

**(2S,4R)-N-(2-((33-chloro-3,6,9,12,15,18,21,24,27-nonaoxatritriacontyl)oxy)-4-(4-methylthiazol-5-yl)benzyl)-4-hydroxy-1-((S)-3-methyl-2-(1-oxoisindolin-2-yl)butanoyl)pyrrolidine-2-carboxamide (SJF-7434).** To a mixture of (2S,4R)-4-hydroxy-N-[[2-hydroxy-4-(4-methylthiazol-5-yl)phenyl]methyl]-1-[(2S)-3-methyl-2-(1-oxoisindolin-2-yl)butanoyl]pyrrolidine-2-carboxamide (22.0 mg, 0.0402 mmol) and 27-chloro-3,6,9,12,15,18,21-heptaaoxaheptacosyl 4-methylbenzenesulfonate (**5**) (23.0 mg, 0.0335 mmol) in DMF (1 mL) was added Cs<sub>2</sub>CO<sub>3</sub> (21.8 mg, 0.0669 mmol). After stirring at room temperature for 12 hrs (overnight), the reaction mixture was diluted with EtOAc (10 mL) and washed with water (5x10 mL), organic phase was dried (Na<sub>2</sub>SO<sub>4</sub>, and evaporated under vacuum. Crude product was purified by PTLC (DCM:MeOH:NH<sub>4</sub>OH, 90:9:1) to give 20 mg of product (56% yield). <sup>1</sup>H NMR (500 MHz, DMSO-d<sub>6</sub>) δ 8.99 (s, 1H), 8.39 (t, J = 5.4 Hz, 1H), 7.71 (d, J = 7.5 Hz, 1H), 7.67 – 7.55 (m, 2H), 7.54 – 7.45 (m, 1H), 7.34 (d, J = 7.7 Hz, 1H), 7.05 (s, 1H), 7.01 (d, J = 7.8 Hz, 1H), 5.11 (d, J = 3.6 Hz, 1H), 4.71 (d, J = 10.8 Hz, 1H), 4.60 – 4.12 (m, 7H), 3.95 – 3.18 (m, 35H), 2.47 (s, 3H), 2.38 – 2.26 (m, 1H), 2.09 – 1.99 (m, 1H), 1.98 – 1.84 (m, 1H), 1.69 (p, J = 6.7 Hz, 2H), 1.47 (p, J = 6.6 Hz, 2H), 1.41 – 1.33 (m, 2H), 1.32 – 1.26 (m, 2H), 0.96 (d, J = 6.2 Hz, 3H), 0.73 (d, J = 6.4 Hz, 3H). <sup>13</sup>C NMR (151 MHz, DMSO-d<sub>6</sub>) δ 171.54, 168.08, 167.46, 155.86, 151.46, 147.92, 142.19, 131.57, 131.37, 131.25, 130.97, 127.90, 127.68, 127.18, 123.61, 123.01, 121.06, 112.13, 70.17, 70.09, 69.85, 69.83, 69.81, 69.78 (17C), 69.74, 69.73, 69.49, 69.00, 68.62, 67.91, 58.71, 57.78, 55.42, 54.93, 46.81, 45.37, 38.10, 37.07, 32.03, 29.06, 28.40, 26.12, 24.94, 18.88, 18.63, 16.04. HRMS (ESI); m/z: [M+H]<sup>+</sup> Calcd. for C<sub>53</sub>H<sub>80</sub>ClN<sub>4</sub>O<sub>14</sub>S, 1063.5080. Found 1063.5063

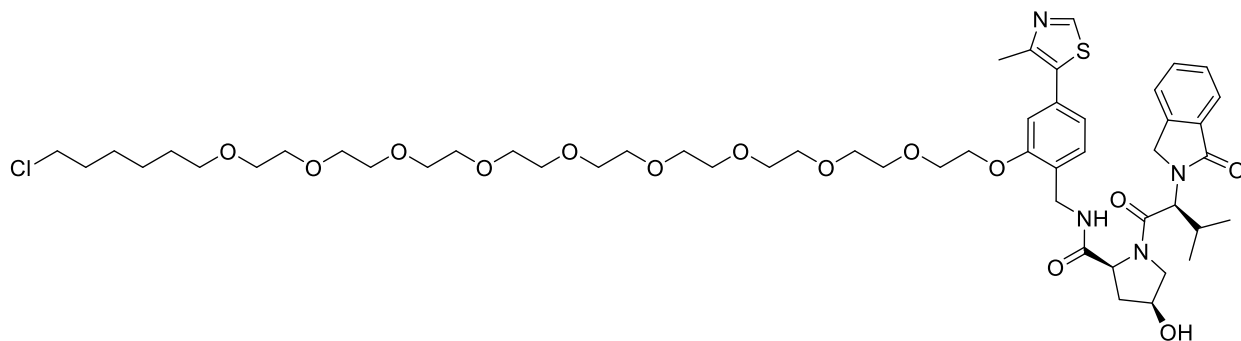

**(2S,4S)-N-(2-((33-chloro-3,6,9,12,15,18,21,24,27-nonaoxatritriacontyl)oxy)-4-(4-methylthiazol-5-yl)benzyl)-4-hydroxy-1-((S)-3-methyl-2-(1-oxoisindolin-2-yl)butanoyl)pyrrolidine-2-carboxamide (JH-6073).** To a mixture of (2S,4S)-4-hydroxy-N-[[2-hydroxy-4-(4-methylthiazol-5-yl)phenyl]methyl]-1-[(2S)-3-methyl-2-(1-oxoisindolin-2-yl)butanoyl]pyrrolidine-2-carboxamide (22.0 mg, 0.0402 mmol) and 2-[2-[2-[2-[2-[2-[2-[2-(6-chlorohexoxy)ethoxy]ethoxy]ethoxy]ethoxy]ethoxy]ethoxy]ethoxy]ethyl 4-methylbenzenesulfonate (23.0 mg, 0.0335 mmol) in N,N-Dimethylformamide (1 mL) was added Cs<sub>2</sub>CO<sub>3</sub> (21.8 mg, 0.0669 mmol). After stirring at room temperature for 12 hrs (overnight), the reaction mixture was diluted with EtOAc/EtOAc (10 mL) and washed with water (5x10 mL), organic phase was dried (Na<sub>2</sub>SO<sub>4</sub>, and evaporated under vacuum. Crude product was purified by PTLC (DCM:MeOH, 9:1) to give 18 mg of product (56% yield). <sup>1</sup>H NMR (500 MHz, CDCl<sub>3</sub>) δ 8.69 (s, 1H), 7.83 (d, J = 7.7 Hz, 1H), 7.62 (t, J = 6.1 Hz, 1H), 7.55 (t, J = 7.4 Hz, 1H), 7.46 (dt, J = 7.5, 3.6 Hz, 2H), 7.32 (d, J = 7.7 Hz, 1H), 6.99 (d, J = 7.7 Hz, 1H), 6.92 (s, 1H), 4.84 (d, J = 11.0 Hz, 1H), 4.76 (d, J = 17.5 Hz, 1H), 4.55 (d, J = 9.0 Hz, 1H), 4.50 (t, J = 5.6 Hz, 2H), 4.47 – 4.36 (m, 2H), 4.22 (q, J = 4.9 Hz, 2H), 4.09 (dd, J = 11.4, 4.4 Hz, 1H), 3.99 – 3.89 (m, 3H), 3.74 (q, J = 4.4 Hz, 2H), 3.68 – 3.54 (m, 26H), 3.52 (t, J = 6.7 Hz, 2H), 3.45 (t, J = 6.5 Hz, 3H), 2.53 (s, 3H), 2.41 – 2.03 (m, 4H), 1.77 (m, 5H), 1.59 (p, J = 6.9 Hz, 2H), 1.44 (t, J = 7.7 Hz, 2H), 1.45 – 1.31 (m, 2H), 0.89 (dd, J = 10.6, 6.5 Hz, 6H). <sup>13</sup>C NMR (151 MHz, CDCl<sub>3</sub>) δ 172.68, 170.77, 169.14, 156.93, 150.52, 148.61, 142.17, 132.60, 131.93, 131.83, 129.88, 128.17, 126.35, 123.93, 123.03, 122.16, 114.64, 112.87, 71.37, 71.03, 70.94, 70.75, 70.72, 70.70, 70.67, 70.65, 70.24, 69.79, 68.05, 60.08, 58.33, 58.27, 47.26, 45.20, 39.55, 35.86, 32.68, 29.59, 29.05, 26.84, 25.56, 19.14, 18.91, 16.24. LC-MS (ESI); m/z [M+Na]<sup>+</sup>; Calcd. C<sub>53</sub>H<sub>79</sub>ClN<sub>4</sub>NaO<sub>14</sub>S, 1085.4900. Found 1085.4894.

## SUPPLEMENTAL FIGURES AND FIGURE LEGENDS

A)

### NFκB-TRAFTAC

5'  
CGUUUUAGAGCUAGAAAUAGCAAGUUAAAAUAAGGCUAGUCCGUUAUCAACUUGAAAAAGUGGCACCGAGUCG  
GUGUUUUU **gctagc ggaattccgggacttccggaattccgggacttccggaattccagatct** 3'

Uppercase- crRNA sequence

Lowercase- DNA sequence

Green-NFκB binding site

Yellow- double stranded sequence

### Reverse DNA

5' gccccggaattccccgaaagt 3'

B) Control-TRAFTAC

5'  
CGUUUUAGAGCUAGAAAUAGCAAGUUAAAAUAAGGCUAGUCCGUUAUCAACUUGAAAAAGUGGCACCGAGUCGGUG  
UUUUU **atccgctcaactgatcgtagtgcgag tcagtactag tactgtcaagcacgctgtacgctcat** 3'

Green- control double strand site

Red/green- DNA sequence

Yellow- double stranded control DNA sequence

### Reverse control DNA

5' acagtactagtactgactgcgac 3'

C)

5' agatctggaaattccccgaaagtccccgaaattccccgaaagtccccgaaattccccgct-Fluorescein 3'

D)

### allscrambled-TRAFTAC

5'  
AUAGAAUAGAUGUACAACUAAGAUCAGUUGGCAAUUGUACAACUAGUAGCAUUAGUCAUUGUU  
CGGUUAUCGCGG agcgtgtatggagcggcgt **cgacggttagtctgccgactatcg** ggtgtcttaacgtcatcta 3'

### ReverseallSCRMB

5' cgatagtcggcagactaacgctcg 3'

**Figure S1. Oligonucleotide sequences for TRAFACs and reverse complements used in this study. Related to STAR methods.**

A) Single stranded NF $\kappa$ B-TRAFAC sequence.

B) Single stranded control-TRAFAC sequence.

C) Reverse complement sequence covalently attached to fluorescein at the 5' end of the sequence.

D) Single stranded sequences of allscrambled-TRAFAC and reverse complement sequence used to generate the double stranded allscrambled-TRAFAC.



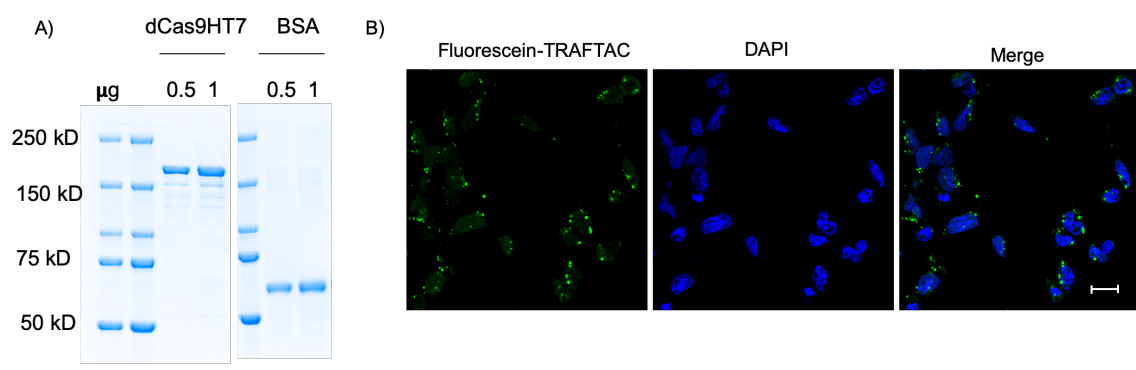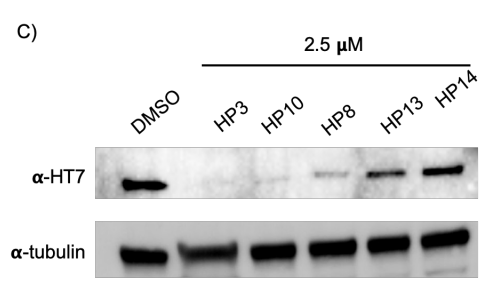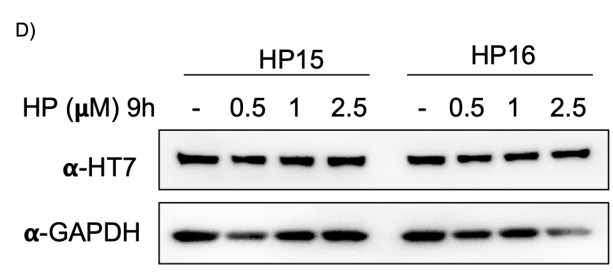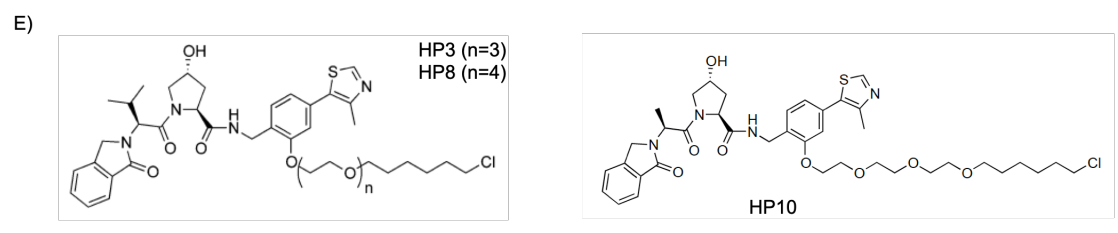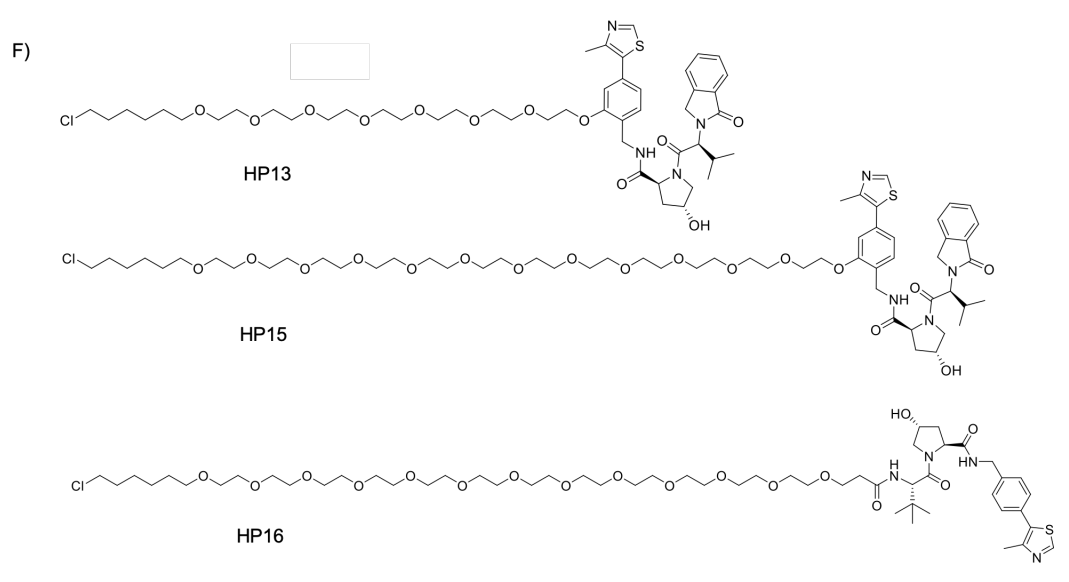

**Figure S2. TRAFAC transfection, HaloPROTAC screening and chemical structures used in the study. Related to Figure 3.**

A) A fusion of HT7 and dCas9 proteins was purified using HIS-tag affinity purification and further purified by size exclusion chromatography. Purified fusion dCas9HT7 protein was ran in parallel with BSA.

B) HEK293 cells were transfected with 25 nM of fluorescein-labeled TRAFAC and after 12 h cells were fixed, permeabilized and labeled with DAPI. Cells were analyzed for fluorescein and DAPI signal by confocal microscopy at 40X magnification. (scale bar: 25  $\mu\text{m}$ ).

C) and D) HaloPROTAC screening towards the degradation of HaloTag fusion protein, dCas9HT7.

E) and F) Chemical structures of HaloPROTACs (HP) used in this study.

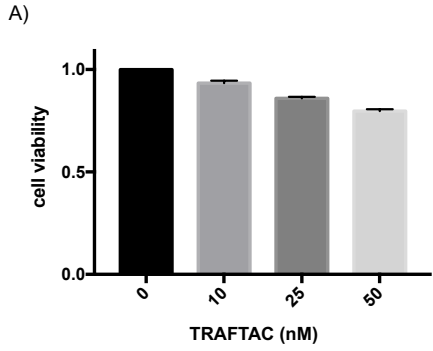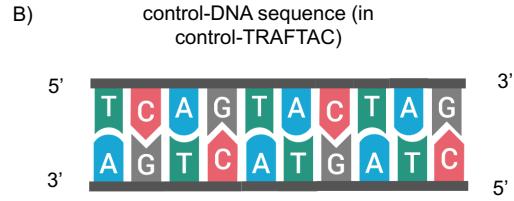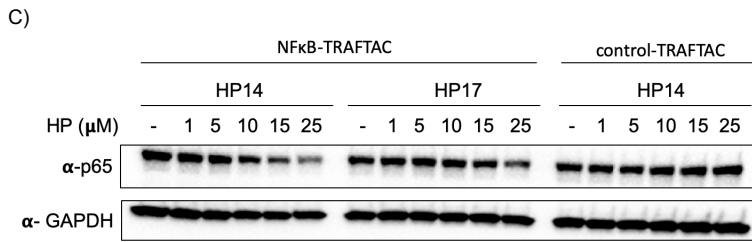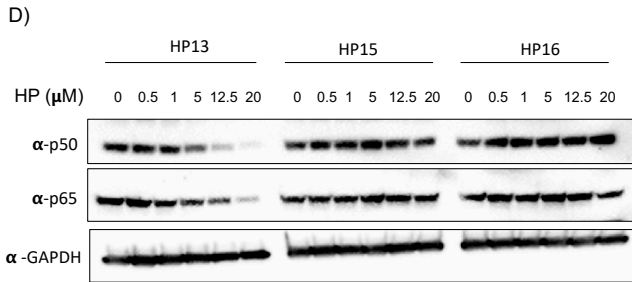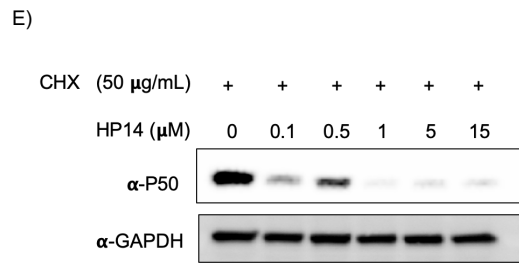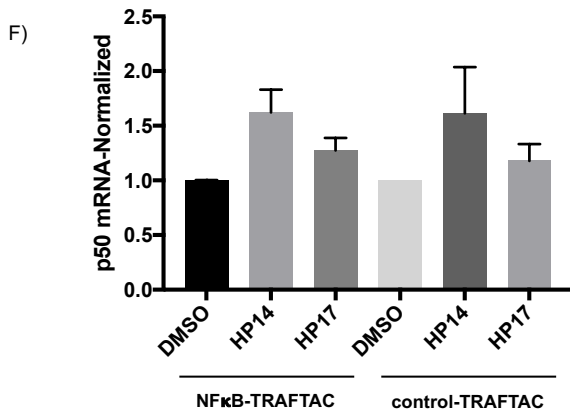

**Figure S3. TRAF2ACs induce NFκB degradation as a posttranslational event. Related to Figure 3.**

A) Cell viability assay. Stable cells that express dCas9HT7 were transfected with increasing concentrations of NFκB-TRAF2AC and after 36 h, cells were subjected to MTS assay.

B) Double stranded, control oligonucleotide sequence used in the control-TRAF2AC.

C) Stable cells overexpressing CT-dCas9HT7 were transfected with NFκB-TRAF2AC or control-TRAF2AC followed by HP and TNF-α treatment. Cells were lysed and analyzed for p65 and GAPDH levels. These data obtained from the same experiment discussed in the Figure 3D. Therefore, GAPDH blot in Figure 3D is the same as Figure S3C.

D) NFκB degradation by HP13, HP15 and HP16. Stable cells were transfected with NFκB-TRAF2AC followed by HP and TNF-α treatment. Cell lysates were probed as indicated.

E) Cycloheximide (CHX) co-incubation with HP14/ TNF-α significantly enhanced p50 degradation levels in NFκB-TRAF2AC transfected cells.

F) Cells were transfected either with NFκB-TRAF2AC or control-TRAF2AC followed by HP14 or HP17 and TNF-α treatment. The pool of isolated RNA was subjected to one-step qRT-PCR using primers specific to p50 and GAPDH and normalized data presented as a bar graph.

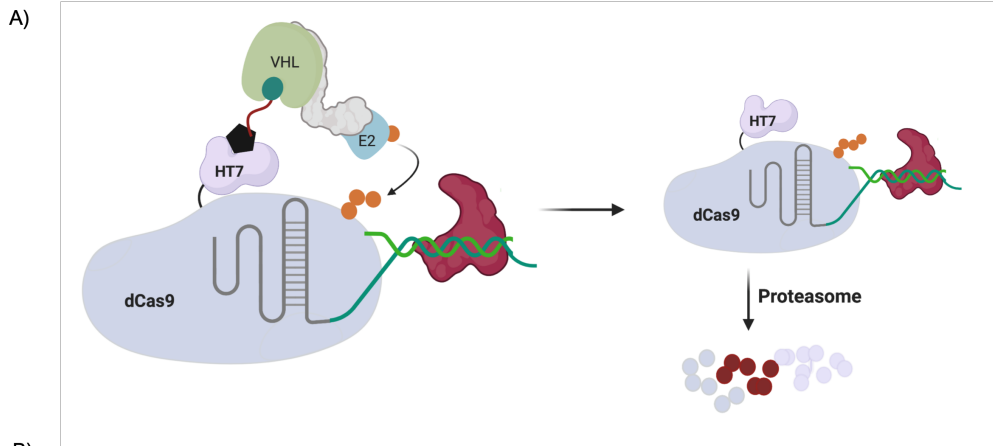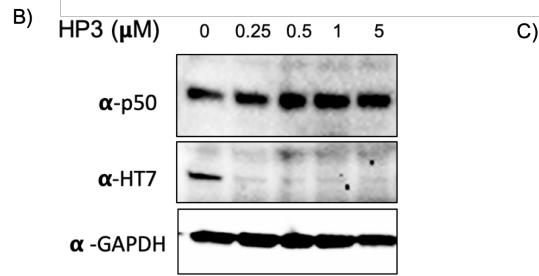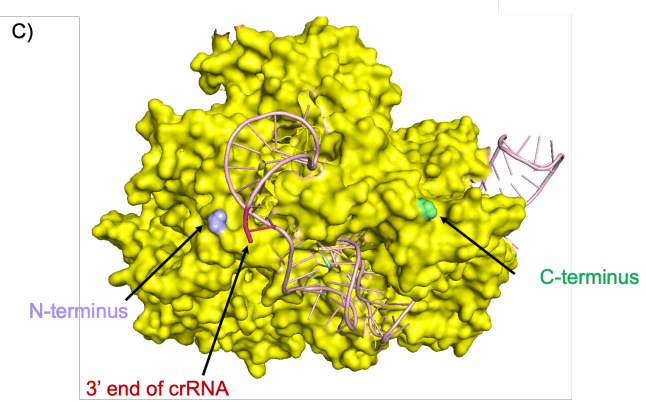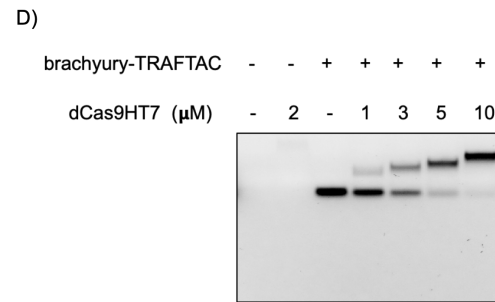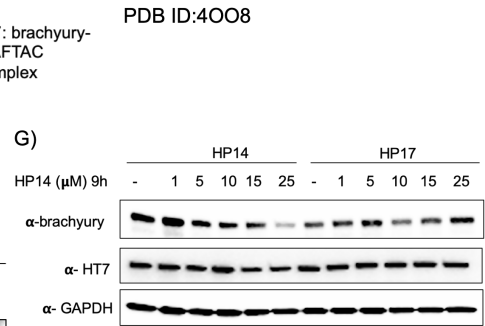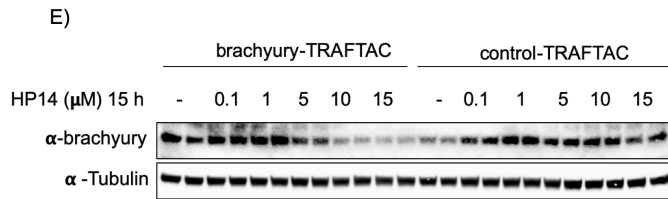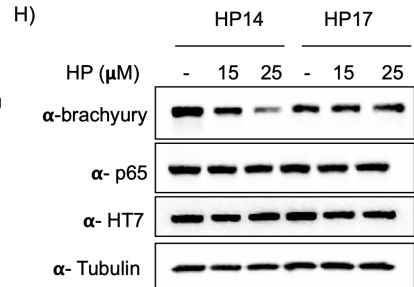

F) crRNA sequence: 5' CGUUUUAGAGCUAGAAAUAGCAAGUUAAAAUAAGGCUAGUCCGUUAUCAACU UGAAAAAGUGCACCGAGUCGGUGUUUUU **gctagcgggaattccgggg actttcc aatttcacacctaggtgtgaaatt** **ggggac ttccgggaattccagatct** 3'

Uppercase- crRNA sequence  
Lowercase- DNA sequence  
Green- Brachyury binding site

RssDNA  
5' gtccccaattcacacctaggtgtgaaattgaaagt 3'

**Figure S4. TRAF7 mediated NFκB degradation did not result from dCas9HT7 degradation. Related to Figure 4.**

A) Schematic representation of possible HP3 mediated degradation of dCas9HT7:TRAF7:p50 complex.

B) Stable cells were transfected with NFκB-TRAF7 and treated with HP3 followed by TNF-α. Lysates were probed as indicated in the figure.

C) Crystal structure of *S. pyogenes* Cas9 in complexed with gRNA (PDB ID:4OO8). Both N- and C-terminal amino acids of the Cas9 protein are located in the space such that N- or C-terminally tagged fusion HT7 can access the 3' end of the Cas9 bound gRNA.

D) Fusion protein of dCas9HT7 forms the binary complex with brachyury-TRAF7s *in vitro* as seen by EMSA.

E) Cells were transfected with brachyury-TRAF7 or control-TRAF7. Then cells were treated with HP14 for 15 and cell lysates were subjected to western blot analysis as shown in the figure.

F) The chimeric oligo sequence of the single stranded brachyury-TRAF7 and reverse complement sequence of brachyury targeting DNA sequence (shown in green).

G) After transfection of brachyury-TRAF7, cells were treated with HP14 and HP17 for 9 h before cell lysis. Cell lysates were analyzed by western blot using antibody against brachyury, HT7 and GAPDH.

H) Brachyury targeting TRAF7 did not induce degradation of other transcription factors. Cells were transfected with brachyury-TRAF7 followed by HP14 and HP17 treatment. After 9 h, cells were lysed and lysates were analyzed for brachyury-GFP, p65, HT7 and tubulin.

A)

|                 |     |                                                           | P402 |     |
|-----------------|-----|-----------------------------------------------------------|------|-----|
| HIF1A_ZEBRAFISH | 363 | AVEKESEETEETSELDILKLFKPELNCLESSTLYNKLKEEPEALTVLAPAAGDAIIS |      | 422 |
|                 |     | VE +S++ + +LF S ++S+L++KLK+EP+ALT+LAPAAGD IIS             |      |     |
| HIF1A_HUMAN     | 363 | PVE-----SSDMKMTQLFTKVE---SEDTSSLFDKLLKKEPDALTLAPAAGDTIIS  |      | 410 |

  

|                 |     |                                                               | P564 |     |
|-----------------|-----|---------------------------------------------------------------|------|-----|
| HIF1A_ZEBRAFISH | 523 | FKLDLVEKLF AIDTEAKTPFSTQPMEDLDLEMLAPYIPMDDDFQLRIPSPLDPLPSATHS |      | 582 |
|                 |     | FKL+LVEKLF A DTEAK PFSTQ DLDLEMLAPYIPMDDDFQLR L PL S++ S      |      |     |
| HIF1A_HUMAN     | 531 | FKLELVEKLF AEDTEAKNPFSTQD-TDLDLEMLAPYIPMDDDFQLRSFDQLSPLESSAS  |      | 589 |

B)

|               |     | HIF1A binding domain                                          |     |
|---------------|-----|---------------------------------------------------------------|-----|
| VHL_ZEBRAFISH | 3   | QDSQEGQQPLPLVRS LISRIQVNVLFNCNSPRVVKPVWINFLGEPQPYVNIQPYTGRRIT | 62  |
|               |     | ++ E +P P++RS+ SR V+FCN SPRVV PVW+NF GEPQPY + P TGRRIT        |     |
| VHL_HUMAN     | 51  | EEEMEAGRPRPVLRSVNSREPSQVIFCNRSRVVLPVWLNFDGEPQPYPTLPPGTGRRIH   | 110 |
| VHL_ZEBRAFISH | 63  | TFVGHVPMFRDAETDDPMVNNKEMYLPALENGQVANAKITLPVLTLRDRCLQVVRRLV    | 122 |
|               |     | ++ GH W+FRDA T D ++VN E+++P+ +GQ A ITLPV TL++RCLQVVR LV       |     |
| VHL_HUMAN     | 111 | SYRGHLWLFRDAGTHDGLLVNQTELFVPSLNVGQPIFANITLPVYTLKERCLQVVRSLV   | 170 |
|               |     | Elongin C binding domain                                      |     |
| VHL_ZEBRAFISH | 123 | RREDVGRLEIARCLQEDLAQRPSIQADLRRISQ                             | 155 |
|               |     | + E+ RL+I R L EDL P++Q DL R++Q                                |     |
| VHL_HUMAN     | 171 | KPENYRRLDIVRSLYEDLEDHPNVQKDLERLTQ                             | 203 |

C)

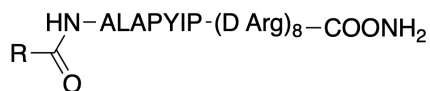

D)

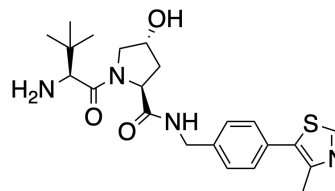

**Figure S5. HIF1A and VHL proteins in human and zebrafish is highly conserved. Related to Figure 6.**

A) Sequence alignment for human and zebrafish HIF1A protein. VHL binding sequence in both species are highly conserved (highlighted in yellow).

B) HIF1A and elongin C binding domains are conserved in zebrafish and human VHL proteins (highlighted in yellow).

C) VHL ligand that derived from VHL-binding HIF1A peptide sequence (LAPYIP).

D) small molecule based VHL ligand is derived from HIF1A peptide sequence which is conserved in zebrafish and human.



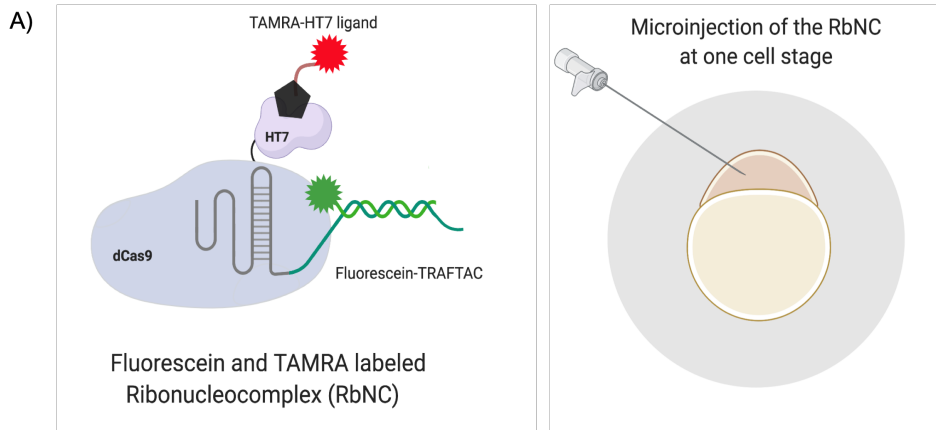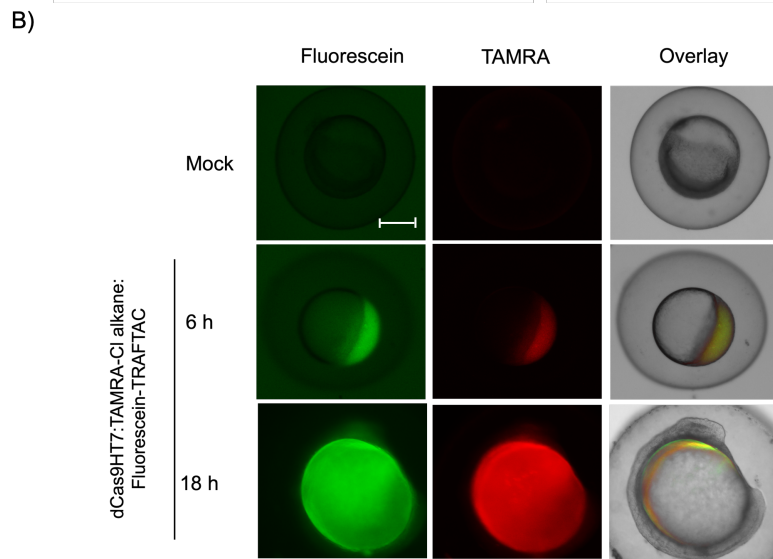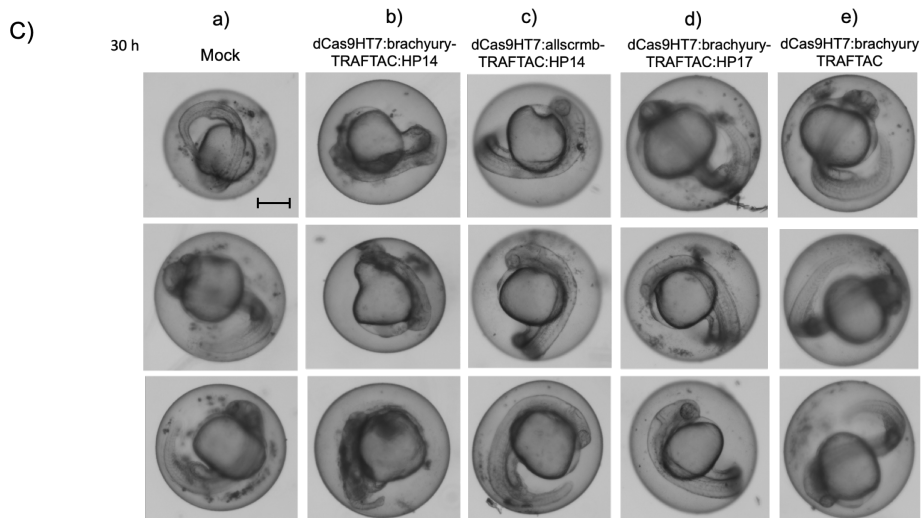

**Figure S6. Microinjection of ribonucleocomplex into zebrafish embryos. Related to Figure 7.**

A) Schematic representations of the ribonucleocomplex and an embryo at one cell stage.

B) Embryos were injected with either mock (buffer solution; a) or ribonucleocomplex consists with dCas9HT7, TAMRA-HT7 ligand and fluorescein labelled TRAF7AC. Injected embryos were incubated at 29 degrees and fluorescence images were captured after 6 and 18 h of post injection. (scale bar: 100  $\mu\text{m}$ ).

C) Brachyury targeting ribonucleocomplex (dCas9HT7:brachyury-TRAF7AC:HP14) induced severe tail deformation. Embryos were injected with mock (a) and all combinations of (b-e) ribonucleocomplexes at single cells stage. After 30 hpf, embryos in each group were analyzed using a microscope for any defects in tail formation. (scale bar: 100  $\mu\text{m}$ ).

**Table S1. List of oligonucleotide sequences used to generate plasmids. Related to STAR methods.**

| Name         | Sequence (5'--3')                                                                                     |
|--------------|-------------------------------------------------------------------------------------------------------|
| F-NTHT7      | ACGTACCTGACTATGCTGGAGCAGAAAUCGGTACTGGCTTTCCATTTCG                                                     |
| R-NTHT7      | ATCAGCGGGTACCGGAAATCUCCAGAGTAGACAGC                                                                   |
| F-NTPCDNA5   | AGATTTCCGGTACCCGCTGAUCAGCCTCG                                                                         |
| R-NTPCDNA5   | ATTTCTGCTCCAGCATAGTCAGGTACGUCATAAGGG                                                                  |
| F-NTdCas9    | ATTTCCGGTGGTGGCTCCAGAUCTGTGGATAAGAAATACTCAATAGGCTT<br>AGCTATCGGC                                      |
| R-NTdCas9    | AGCGGGTTTAGTCACCTCCTAGCUGACTCAAATCAATGC                                                               |
| F-NTPCDNA5   | AGCTAGGAGGTGACTAAACCCGCUGATCAGCCTCG                                                                   |
| R-NTPCDNA5   | ATCTGGAGCCACCACCGGAAAUCTCCAGAGTAGACAGC                                                                |
| F-PNLGFP     | AGCAAGGGCGAGGAGCUG                                                                                    |
| R-PNLGFP     | AGTCGCGGCCTTACTTGTGUCATCGTCTTTGTAGTCTGAGTTTGTATCT<br>CGAGCCTTGTACAGCTC                                |
| F-flagPNL    | ACGACAAGTAAGGCCGCGACUCTAGAGTCGG                                                                       |
| R-flagPNL    | AGTCCTCGCCCTTGCUCACCGCCAGAATGCGTTTCGCAC                                                               |
| F-Cas9CTNLSN | GATTTGAGTCAGCTAGGAGGTGAC AAAAGGCCGGCGGCCACGAAAAA<br>GGCCGGCCAGGCAAAAAAGAAAAAG TAA ACC CGC TGA TCA GCC |
| R-Cas9CTNLSN | GGCTGATCAGCGGGTTTACTTTTTCTTTTTTGCCTGGCCGGCCTTTTTTCGT<br>GGCCGGCCGGCCTTTTGTACCTCCTAGCTGACTCAAATC       |
